# Supplementary material for: Prediction of a model crystal structure for Ni2F5 by first-principles calculations
Source: publisher site journal article supplement (doi:10.1515/znb-2022-0072), 2022-05-30
Supplement: Supplementary file 1 [file j_znb-2022-0072_suppl.pdf]

## **Supporting Information**

Prediction of a Model Crystal Structure for  $\text{Ni}_2\text{F}_5$  by First-Principles Calculations

T. Lindič, S. Sinha, S. Mattsson, B. Paulus

The crystallographic data for the most stable magnetic phases of all the investigated structures are presented in this supporting information. For all the structures there are two sets of data, the one with the average  $U$  value of  $\text{Ni}^{2+}$  and  $\text{Ni}^{3+}$  which is denoted in tables as  $U(\text{av.})$  and the other with the specific  $U$  value given on the appropriate Ni atoms (see computational details for detailed explanation), denoted by  $U$ . The investigated structures are numbered depending on their parent crystal structures by Roman numerals: I ( $\text{Cr}_2\text{F}_5$ ), II ( $\text{FeAlF}_5$ ), III ( $\text{MnAlF}_5$ ), IV ( $\text{V}_2\text{O}_5$ ). Structures II, III and IV are described briefly in terms of their crystal structure and magnetic ordering. For discussion of the most stable structure I the reader is directed to the main text. The energies of all the structures are given relative to the most stable structure I (in the tables they are denoted as  $\Delta E$ ) and are shown in Figure S1.

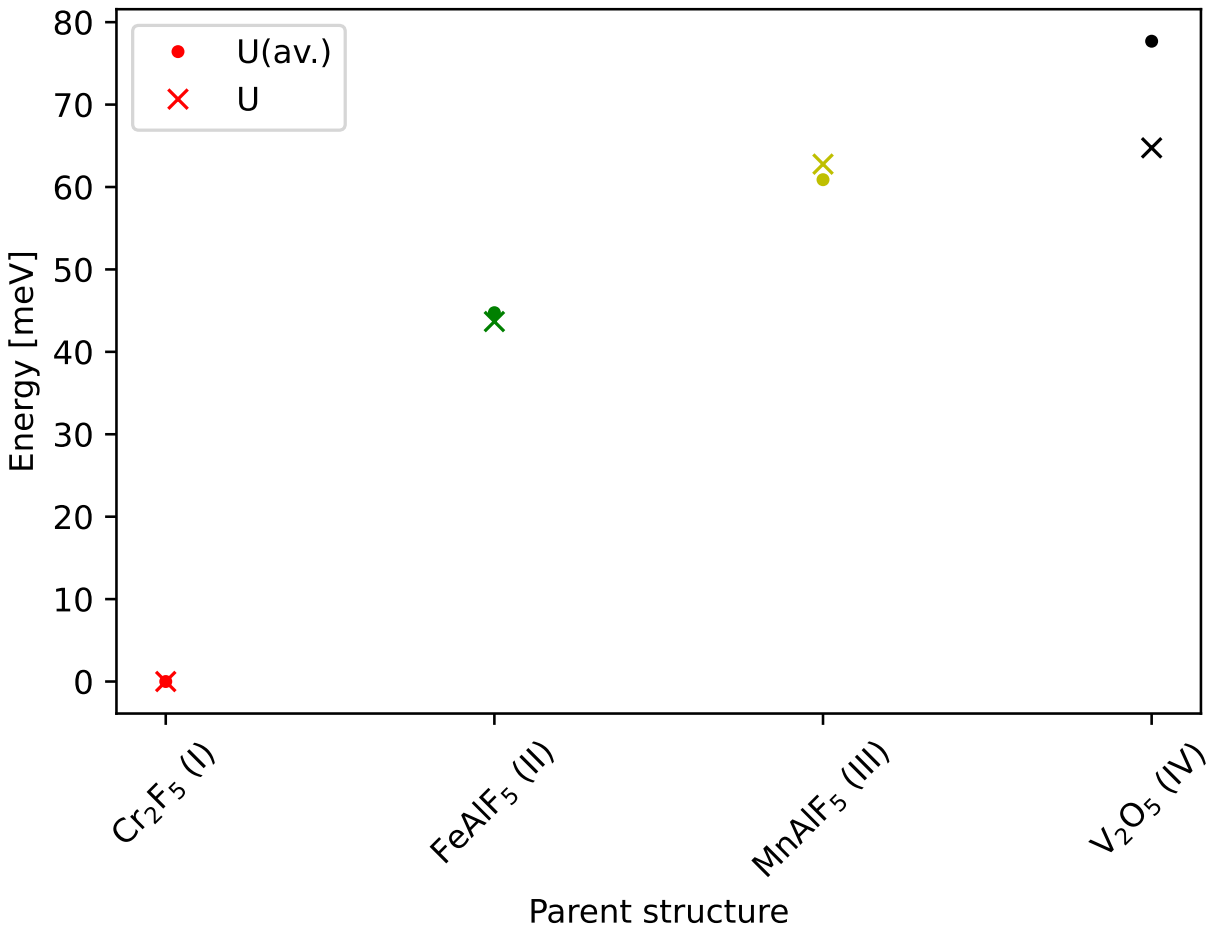

Figure S1: Stability of investigated structures relative to the most stable structure I.

## 1. Structure I - $\text{Cr}_2\text{F}_5$ -type

Table S1:  $\Delta E$  (in meV), space group and optimised cell parameters, lengths in Å, volume in Å<sup>3</sup>, angles in °, total magnetic moment  $\mu$  (in  $\mu_B$ ) for optimised structure I.

| Case   | $\Delta E$ | SG     | V      | a    | b    | c    | $\beta$ | $\mu$ |
|--------|------------|--------|--------|------|------|------|---------|-------|
| U(av.) | 0          | $C2/c$ | 331.86 | 7.24 | 7.40 | 7.08 | 118.9   | 0.00  |
| U      | 0          | $C2/c$ | 331.86 | 7.24 | 7.40 | 7.08 | 118.9   | 0.00  |

Table S2: Bond distances (in Å) between both Ni centres and surrounding F atoms. Atom numbering is the same as in Figure 1.

| #F | $\text{Ni}^{3+}(1)$ |       | #F | $\text{Ni}^{2+}(2)$ |       |
|----|---------------------|-------|----|---------------------|-------|
|    | U(av.)              | U     |    | U(av.)              | U     |
| 1  | 1.847               | 1.847 | 6  | 1.930               | 1.930 |
| 2  | 1.834               | 1.834 | 7  | 2.154               | 2.154 |
| 3  | 1.941               | 1.941 | 8  | 2.171               | 2.171 |
| 4  | 1.834               | 1.834 | 9  | 2.154               | 2.154 |
| 5  | 1.941               | 1.941 | 10 | 2.171               | 2.171 |
| 6  | 1.847               | 1.847 | 11 | 1.930               | 1.930 |

Table S3: Bond angles in both  $\text{Ni}^{2+}$  and  $\text{Ni}^{3+}$  octahedra (in  $^\circ$ ) in structure I. Atom numbering is the same as in Figure 1.

|                 | U(av.) | U     |                  | U(av.) | U     |
|-----------------|--------|-------|------------------|--------|-------|
| F(1)–Ni(1)–F(2) | 93.9   | 93.9  | F(6)–Ni(2)–F(7)  | 92.9   | 92.9  |
| F(2)–Ni(1)–F(3) | 89.6   | 89.6  | F(7)–Ni(2)–F(8)  | 69.5   | 69.5  |
| F(3)–Ni(1)–F(4) | 90.4   | 90.4  | F(8)–Ni(2)–F(9)  | 110.5  | 110.5 |
| F(4)–Ni(1)–F(5) | 89.6   | 89.6  | F(9)–Ni(2)–F(10) | 69.5   | 69.5  |
| F(5)–Ni(1)–F(2) | 90.4   | 90.4  | F(10)–Ni(2)–F(7) | 110.5  | 110.5 |
| F(1)–Ni(1)–F(6) | 180.0  | 180.0 | F(6)–Ni(2)–F(11) | 180.0  | 180.0 |

Table S4: Absolute magnetic moments (in  $\mu_B$ ) and Bader charges (in e) for optimised structure I.

|                  | $\mu$     |           | Bader charge |              |
|------------------|-----------|-----------|--------------|--------------|
|                  | U(av.)    | U         | U(av.)       | U            |
| $\text{Ni}^{2+}$ | 2.28      | 2.32      | 1.74         | 1.74         |
| $\text{Ni}^{3+}$ | 1.84      | 1.82      | 1.45         | 1.45         |
| F                | 0.00-0.11 | 0.00-0.10 | -(0.60-0.67) | -(0.61-0.67) |

## 2. Structure II - FeAlF<sub>5</sub>-type

Crystal structure II is derived from the crystal structure of FeAlF<sub>5</sub>, space group *Immm* with 4 Ni<sub>2</sub>F<sub>5</sub> formula units in the unit cell. Structurally it is very similar to the crystal structure of Cr<sub>2</sub>F<sub>5</sub>, consisting of rutile-like edge sharing octahedra formed by Ni<sup>2+</sup> centres and rows of corner sharing octahedra formed by Ni<sup>3+</sup> centres (see Figure S3). The main difference, compared to the structure I, is that the angles in the octahedron around the Ni<sup>3+</sup> are 90° and the angles between the neighbouring octahedra of Ni atoms in different oxidation states (i.e. Ni(II)-F-Ni(III)) are 180°. The only angles which deviate from these are the ones shown in Table S6.

Magnetic ordering in the structure is antiferromagnetic (for the magnitudes of magnetic moments and Bader charges see Table S7) with alternating spin up and spin down magnetic moments within the Ni<sup>2+</sup> and Ni<sup>3+</sup> rows and antiferromagnetic coupling between the neighbouring nickel centres of different oxidation states (see Figure S3). Similarly as in the case of the C2/c structure five superexchange couplings can be identified (see main text for detailed discussion), antiferromagnetic between the Ni centres in the like oxidation state (with the superexchange angle of 111.7° for Ni<sup>2+</sup> and 180.0° for Ni<sup>3+</sup>), two ferrimagnetic (with the superexchange angles of 124.7° and 180°) and one ferromagnetic between the Ni centres of different oxidations states (superexchange angle of 123.6°) .

Table S5:  $\Delta E$  (in meV), space group and optimised cell parameters, lengths in Å, volume in Å<sup>3</sup>, total magnetic moment  $\mu$  (in  $\mu_B$ ) for optimised structure II.

| Case   | $\Delta E$ | SG          | V      | a    | b    | c    | $\mu$ |
|--------|------------|-------------|--------|------|------|------|-------|
| U(av.) | 44.8       | <i>Immm</i> | 342.84 | 7.53 | 6.34 | 7.18 | 0.00  |
| U      | 43.7       | <i>Immm</i> | 342.84 | 7.53 | 6.34 | 7.18 | 0.00  |

Table S6: Bond distances (in Å) between both Ni centres and surrounding F atoms and some selected bond angles (in °). Atom numbering is the same as in Figure S2.

| #F | Ni <sup>2+</sup> (1) |                      | #F | Ni <sup>3+</sup> (2) |                      | Angles          |       |
|----|----------------------|----------------------|----|----------------------|----------------------|-----------------|-------|
|    | U(av.)               | U(Ni <sup>2+</sup> ) |    | U(av.)               | U(Ni <sup>3+</sup> ) |                 |       |
| 1  | 2.188                | 2.188                | 6  | 1.953                | 1.953                | U(av.)          |       |
| 2  | 2.150                | 2.150                | 7  | 1.794                | 1.794                | F(1)-Ni(1)-F(2) | 111.7 |
| 3  | 1.920                | 1.920                | 8  | 1.845                | 1.845                | F(1)-Ni(1)-F(4) | 67.6  |
| 4  | 2.188                | 2.188                | 9  | 1.796                | 1.796                | U(av.)          |       |
| 5  | 1.920                | 1.920                | 10 | 1.845                | 1.845                | F(1)-Ni(1)-F(2) | 111.7 |
| 6  | 2.150                | 2.150                | 11 | 1.953                | 1.953                | F(1)-Ni(1)-F(4) | 67.6  |

Table S7: Absolute magnetic moments (in  $\mu_B$ ) and Bader charges (in e) for optimised structure II.

|                  | $\mu$     |           | Bader charge |              |
|------------------|-----------|-----------|--------------|--------------|
|                  | U(av.)    | U         | U(av.)       | U            |
| Ni <sup>2+</sup> | 1.83      | 1.81      | 1.48         | 1.48         |
| Ni <sup>3+</sup> | 2.28      | 2.32      | 1.72         | 1.73         |
| F                | 0.00-0.10 | 0.00-0.10 | -(0.60-0.68) | -(0.60-0.68) |

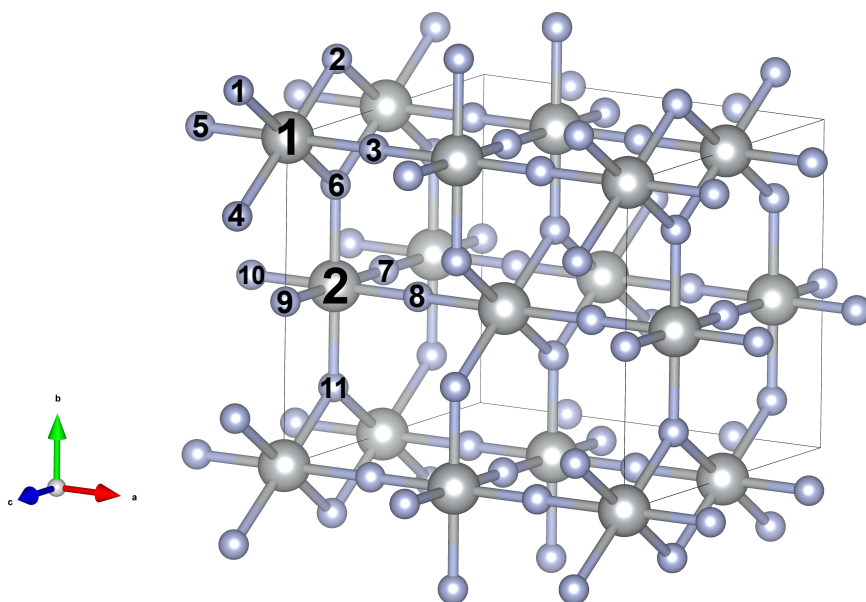

Figure S2: PBE+U optimised structure of  $\text{Ni}_2\text{F}_5$  derived from the crystal structure of  $\text{FeAlF}_5$ , Ni atoms are shown in grey and F atoms in blue.

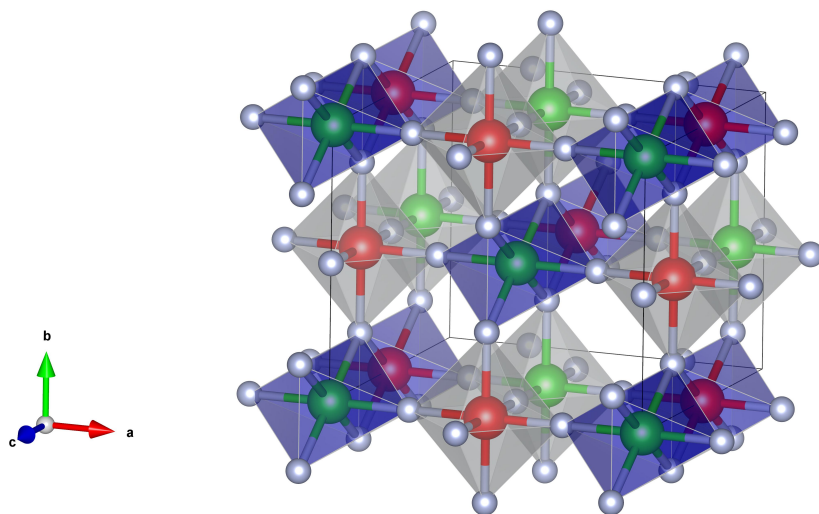

Figure S3: Crystal structure of  $\text{Ni}_2\text{F}_5$  with blue and grey octahedra representing  $\text{Ni}^{2+}$  and  $\text{Ni}^{3+}$  environments, respectively. Red and green represent the opposite orientation of magnetic moments of Ni atoms.

### 3. Structure III - $\text{MnAlF}_5$ -type

Structure III is derived from the crystal structure of  $\text{MnAlF}_5$ , space group  $Cmcm$ , with 8 formula units in the unit cell. It can be described as consisting of edge sharing octahedra of  $\text{Ni}^{2+}$  centres, similar as in the rutile, and corner sharing  $\text{Ni}^{3+}$  centre octahedra. These chains are connected to each other in two ways, each  $\text{Ni}^{3+}$  octahedron shares one corner with one free corner of the  $\text{Ni}^{2+}$  octahedron and another corner with the fluorine atom which is part of the rutile-like edge shared chain, making the fluorine connected to three Ni atoms (see Figure S5). Both types of octahedra have three pairs of equal bond lengths (see Table S9), but are highly distorted with respect to the bond angles (see Table S10).

Magnetic ordering in the structure is antiferromagnetic (for the magnitude of magnetic moments and Bader charges see Table S11). Similarly as in the structures I and II magnetic ordering within the rows of both  $\text{Ni}^{2+}$  and  $\text{Ni}^{3+}$  is antiferromagnetic (with the superexchange angles of  $111.5^\circ$  for the former and  $164.5^\circ$  for the latter). In contrast to the structures I and II there are two ferromagnetic couplings between the  $\text{Ni}^{2+}$  and  $\text{Ni}^{3+}$  octahedra (with a superexchange angles of  $168.0^\circ$  and  $124.2^\circ$ ) and one ferrimagnetic coupling (with a superexchange angle of  $123.3^\circ$ ).

Table S8:  $\Delta E$  (in meV), space group and optimised cell parameters, lengths in Å, volume in Å<sup>3</sup>, total magnetic moment  $\mu$  (in  $\mu_B$ ) for optimised structure III.

| Case   | $\Delta E$ | SG     | V      | a    | b    | c    | $\mu$ |
|--------|------------|--------|--------|------|------|------|-------|
| U(av.) | 60.9       | $Cmcm$ | 683.73 | 7.90 | 9.88 | 9.63 | 0.00  |
| U      | 62.8       | $Cmcm$ | 683.73 | 7.19 | 9.88 | 9.63 | 0.00  |



Table S9: Bond distances (in Å) between both Ni centres and surrounding F atoms. Atom numbering is the same as in Figure S4.

| #F | Ni <sup>2+</sup> (1) |       | #F | Ni <sup>3+</sup> (2) |       |
|----|----------------------|-------|----|----------------------|-------|
|    | U(av.)               | U     |    | U(av.)               | U     |
| 1  | 1.919                | 1.919 | 6  | 1.851                | 1.851 |
| 2  | 2.152                | 2.152 | 7  | 1.815                | 1.815 |
| 3  | 2.152                | 2.152 | 8  | 1.851                | 1.851 |
| 4  | 2.200                | 2.200 | 9  | 1.954                | 1.954 |
| 5  | 2.200                | 2.200 | 10 | 1.813                | 1.813 |
| 6  | 1.919                | 1.919 | 11 | 1.954                | 1.954 |

Table S10: Bond angles in both Ni<sup>2+</sup> and Ni<sup>3+</sup> octahedra (in °). Atom numbering is the same as in Figure S4.

|                 | U(av.) | U     |                  | U(av.) | U     |
|-----------------|--------|-------|------------------|--------|-------|
| F(1)–Ni(1)–F(2) | 90.4   | 90.4  | F(6)–Ni(2)–F(7)  | 91.2   | 91.2  |
| F(2)–Ni(1)–F(3) | 69.4   | 69.4  | F(7)–Ni(2)–F(8)  | 95.4   | 95.4  |
| F(3)–Ni(1)–F(4) | 111.5  | 111.5 | F(8)–Ni(2)–F(9)  | 84.6   | 84.6  |
| F(4)–Ni(1)–F(5) | 67.7   | 67.7  | F(9)–Ni(2)–F(10) | 84.7   | 84.7  |
| F(5)–Ni(1)–F(2) | 111.5  | 111.5 | F(10)–Ni(2)–F(8) | 95.4   | 95.4  |
| F(1)–Ni(1)–F(6) | 178.7  | 178.7 | F(6)–Ni(2)–F(11) | 179.9  | 179.9 |

Table S11: Absolute magnetic moments (in  $\mu_B$ ) and Bader charges (in e) for optimised structure III.

|                  | $\mu$     |           | Bader charge |              |
|------------------|-----------|-----------|--------------|--------------|
|                  | U(av.)    | U         | U(av.)       | U            |
| Ni <sup>2+</sup> | 1.83      | 1.82      | 1.46         | 1.46         |
| Ni <sup>3+</sup> | 2.30      | 2.33      | 1.76         | 1.77         |
| F                | 0.00-0.10 | 0.00-0.10 | -(0.62-0.66) | -(0.60-0.68) |

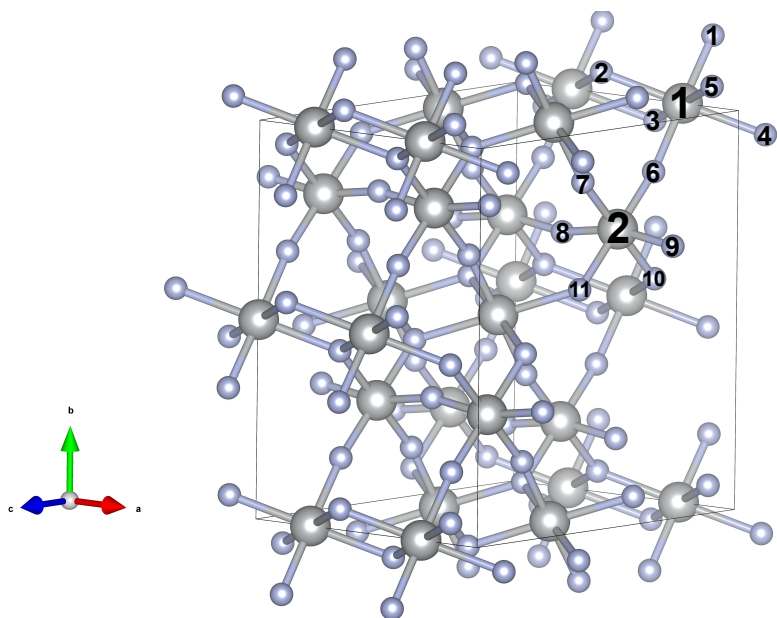

Figure S4: PBE+U optimised structure of  $\text{Ni}_2\text{F}_5$  derived from the crystal structure of  $\text{MnAlF}_5$ , Ni atoms are shown in grey and F atoms in blue.

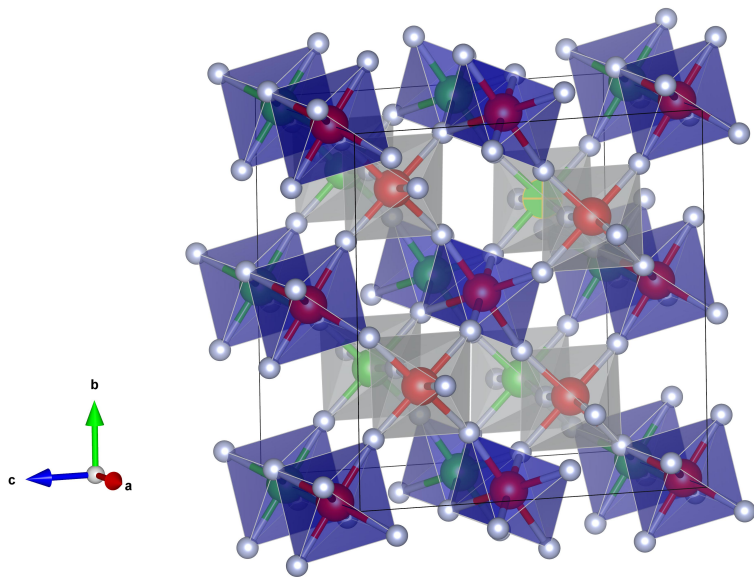

Figure S5: Crystal structure of  $\text{Ni}_2\text{F}_5$  (III) with blue and grey octahedra representing  $\text{Ni}^{2+}$  and  $\text{Ni}^{3+}$  environments, respectively. Red and green represent the opposite orientation of magnetic moments of Ni atoms.

#### 4. Structure IV - $V_2O_5$ -type

Structure IV is derived from the crystal structure of  $V_2O_5$ , space group  $Pmn2_1$  with 8  $Ni_2F_5$  formula units in the investigated unit cell. V atoms in the parent crystal structure are symmetry related, hence to produce two distinct environments for  $Ni^{2+}$  and  $Ni^{3+}$  symmetry reduction was carried out by displacing some Ni atoms prior to the optimisation of internal coordinates.

The structure consists of chains of corner sharing octahedra of  $Ni^{2+}$  and  $Ni^{3+}$ , respectively. These chains are connected together by sharing an edge and a corner opposite to that edge (see Figure S7). The octahedra around both metal centres are highly distorted (see Tables S13 and S14).

Overall magnetic ordering in the structure is antiferromagnetic (for the magnitudes of magnetic moments and Bader charges see S15). As with the other structures the ordering within the chains of the atoms in the like oxidation states is antiferromagnetic (see Figure S7). The superexchange angles are  $178.4^\circ$  (b-axis direction) and  $152.9^\circ$  (c-axis direction) between the  $Ni^{2+}$  centres and  $166.5^\circ$  (b-axis direction) and  $177.9^\circ$  (c-axis direction) between the  $Ni^{3+}$  octahedra. Among the Ni centres in different oxidation states there are three different superexchange interactions: ferrimagnetic through the corner sharing fluorine atom (with the superexchange angle of  $179.9^\circ$ ) and through the edge sharing fluorines (with the superexchange angles of  $103.8^\circ$  and  $96.8^\circ$ ). The last magnetic coupling is ferromagnetic through the edge sharing fluorines (with the superexchange angles of  $103.2^\circ$  and  $96.4^\circ$ ).

One of the possible reasons for this structure being the highest in energy can be found in its magnetic structure. It consist of magnetically frustrated platelets, where the Goodenough Kanamori rules are not satisfied and consequently the energy is raised.

Table S12:  $\Delta E$  (in meV), space group and optimised cell parameters, lengths in Å, volume in Å<sup>3</sup>, angles in °, total magnetic moment  $\mu$  (in  $\mu_B$ ) for optimised structure IV.

| Case   | $\Delta E$ | SG       | V      | a     | b    | c    | $\mu$ |
|--------|------------|----------|--------|-------|------|------|-------|
| U(av.) | 77.7       | $Pmn2_1$ | 716.85 | 12.21 | 7.84 | 7.49 | 0.00  |
| U      | 64.8       | $Pmn2_1$ | 739.41 | 12.35 | 7.94 | 7.54 | 0.00  |

Table S13: Bond distances (in Å) between both Ni centres and surrounding F atoms. Atom numbering is the same as in Figure S6.

| #F | Ni <sup>2+</sup> (1) |       | #F | Ni <sup>3+</sup> (2) |       |
|----|----------------------|-------|----|----------------------|-------|
|    | U(av.)               | U     |    | U(av.)               | U     |
| 1  | 2.016                | 2.047 | 5  | 1.970                | 1.998 |
| 2  | 1.872                | 1.886 | 6  | 1.900                | 1.900 |
| 3  | 1.961                | 1.991 | 7  | 1.873                | 1.886 |
| 4  | 1.873                | 1.886 | 8  | 1.776                | 1.785 |
| 5  | 2.142                | 2.146 | 9  | 1.872                | 1.885 |
| 6  | 2.015                | 2.046 | 10 | 1.974                | 2.004 |

Table S14: Bond angles in both Ni<sup>2+</sup> and Ni<sup>3+</sup> octahedra (in °). Atom numbering is the same as in Figure S6.

|                 | U(av.) | U     |                  | U(av.) | U     |
|-----------------|--------|-------|------------------|--------|-------|
| F(1)–Ni(1)–F(2) | 90.2   | 90.1  | F(6)–Ni(2)–F(7)  | 88.9   | 89.0  |
| F(2)–Ni(1)–F(3) | 89.3   | 89.3  | F(7)–Ni(2)–F(8)  | 91.0   | 90.9  |
| F(3)–Ni(1)–F(4) | 89.1   | 89.1  | F(8)–Ni(2)–F(9)  | 91.1   | 91.0  |
| F(4)–Ni(1)–F(5) | 90.9   | 90.8  | F(9)–Ni(2)–F(6)  | 89.0   | 89.1  |
| F(5)–Ni(1)–F(2) | 90.8   | 90.7  | F(6)–Ni(2)–F(5)  | 83.7   | 83.0  |
| F(1)–Ni(1)–F(6) | 152.9  | 151.8 | F(5)–Ni(2)–F(10) | 166.8  | 165.5 |

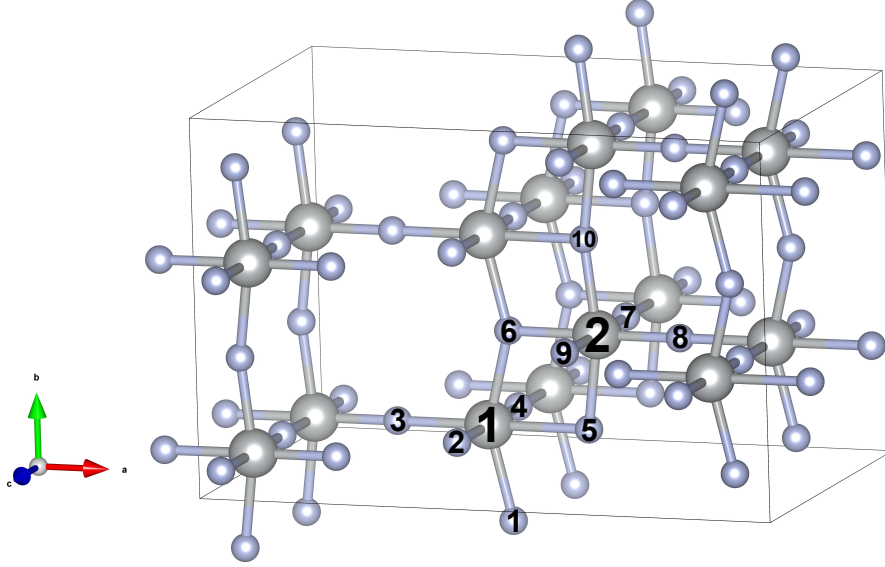

Figure S6: PBE+U optimised structure of  $\text{Ni}_2\text{F}_5$  derived from the crystal structure of  $\text{V}_2\text{O}_5$ , Ni atoms are shown in grey and F atoms in blue.

Table S15: Absolute magnetic moments (in  $\mu_B$ ) and Bader charges (in e) for optimised structure III.

|                  | $\mu$     |           | Bader charge |              |
|------------------|-----------|-----------|--------------|--------------|
|                  | U(av.)    | U         | U(av.)       | U            |
| $\text{Ni}^{2+}$ | 1.82      | 1.780     | 1.44         | 1.45         |
| $\text{Ni}^{3+}$ | 2.24      | 2.27      | 1.74         | 1.74         |
| F                | 0.00-0.20 | 0.00-0.15 | -(0.58-0.69) | -(0.60-0.67) |

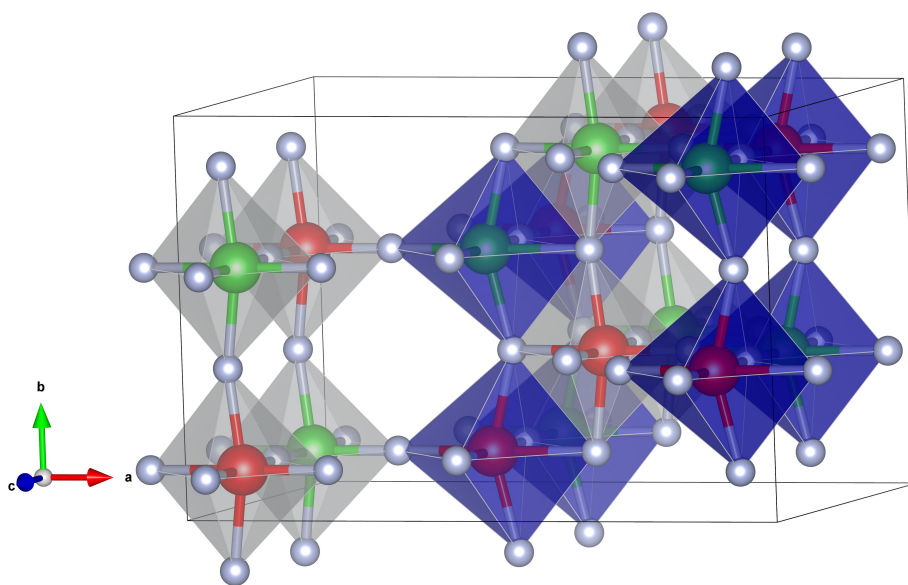

Figure S7: Crystal structure of  $\text{Ni}_2\text{F}_5$  (IV) with blue and grey octahedra representing  $\text{Ni}^{2+}$  and  $\text{Ni}^{3+}$  environments, respectively. Red and green represent the opposite orientation of magnetic moments of Ni atoms.
